# Supplementary material
Source: PubMed Central journal article supplement (PMC6143003)
Supplement: jamaoncol-4-1207-s002.pdf [file jamaoncol-4-1207-s002.pdf]

## Supplementary Online Content

Matsuda N, Wang X, Lim B, et al. Safety and efficacy of panitumumab plus neoadjuvant chemotherapy in patients with primary HER2-negative inflammatory breast cancer. *JAMA Oncol.* Published online June 7, 2018. doi:10.1001/jamaoncol.2018.1436

**eTable 1.** Dermatology/Skin/Nail Assessment (from NCI Common Toxicity Criteria for Adverse Events, version 3.0, with modifications)

**eTable 2.** Expression of Candidate Proteins at Baseline and Week 2 and Change in Expression of Candidate Proteins between Baseline and Week 2 by Patient pCR Status

**eTable 3.** Genes Significantly Changed in Patient Samples between Before and After Panitumumab Treatment

**eFigure 1.** Trial Design

**eFigure 2.** Panitumumab Dose Modification Algorithm for Toxicity

**eFigure 3.** Disease-free Survival (A) and Overall Survival (B) Estimates for 37 Evaluable Patients

**eFigure 4.** Differentially Expressed Genes Regulated by Panitumumab

This supplementary material has been provided by the authors to give readers additional information about their work.

**eTable 1.** Dermatology/Skin/Nail Assessment (from NCI Common Toxicity Criteria for Adverse Events, version 3.0, with modifications)

| Adverse Event                                                            | Grade 1                                                                                | Grade 2                                                                                                                                                               | Grade 3                                                                                                                     | Grade 4                                                                                                                                   |
|--------------------------------------------------------------------------|----------------------------------------------------------------------------------------|-----------------------------------------------------------------------------------------------------------------------------------------------------------------------|-----------------------------------------------------------------------------------------------------------------------------|-------------------------------------------------------------------------------------------------------------------------------------------|
| Nail changes                                                             | Discoloration; ridging (koilonychias; pitting), paronychia: intervention not indicated | Partial or complete loss of nail(s); pain in nailbed(s), paronychia: intervention indicated                                                                           | Interfering with activities of daily living (ADL)                                                                           | —                                                                                                                                         |
| Erythema                                                                 | Painless erythema                                                                      | Painful erythema                                                                                                                                                      | Erythema with desquamation*                                                                                                 | Life-threatening; disabling                                                                                                               |
| Pruritus/itching                                                         | Mild or localized                                                                      | Intense or widespread                                                                                                                                                 | Intense or widespread and interfering with ADL                                                                              | —                                                                                                                                         |
| Rash: acne/acneiform                                                     | Intervention not indicated                                                             | Intervention indicated                                                                                                                                                | Associated with pain requiring narcotic analgesics, ulceration, or desquamation*                                            | —                                                                                                                                         |
| Rash/desquamation* (Use for non-acneiform rash or non-folliculitis rash) | Macular or papular eruption or erythema without associated symptoms                    | Macular or papular eruption or erythema with pruritus or other associated symptoms; localized desquamation* or other lesions covering <50% of body surface area (BSA) | Severe, generalized erythroderma or macular, papular or vesicular eruption; desquamation* covering ≥50% of BSA              | Generalized exfoliative, ulcerative, or bullous dermatitis                                                                                |
| Ulceration                                                               | —                                                                                      | Superficial ulceration <2 cm; local wound care; medical intervention indicated                                                                                        | Ulceration ≥ 2cm; operative debridement, primary closure or other invasive intervention indicated (e.g., hyperbaric oxygen) | Life-threatening consequences; major invasive intervention indicated (e.g., complete resection, tissue reconstruction, flap, or grafting) |

\*Desquamation is defined as sloughing of skin and does not apply to dry flaking skin.

| <b>eTable 2.</b> Expression of Candidate Proteins at Baseline and Week 2 and Change in Expression of Candidate Proteins between Baseline and Week 2 by Patient pCR Status <sup>a</sup> |               |                |            |                |            |
|----------------------------------------------------------------------------------------------------------------------------------------------------------------------------------------|---------------|----------------|------------|----------------|------------|
| Variable                                                                                                                                                                               | No pCR (N=26) |                | pCR (N=11) |                | P Value    |
|                                                                                                                                                                                        | N             | Median (range) | N          | Median (range) |            |
| EGFR                                                                                                                                                                                   |               |                |            |                |            |
| Baseline                                                                                                                                                                               | 18            | 0 (0-300)      | 5          | 120 (0-300)    | .14        |
| Week 2                                                                                                                                                                                 | 3             | 285 (20-300)   | 4          | 105 (10-285)   | .48        |
| Change                                                                                                                                                                                 | 3             | 0 (0-265)      | 2          | 7.5 (-15-30)   | .77        |
| pEGFR                                                                                                                                                                                  |               |                |            |                |            |
| Baseline                                                                                                                                                                               | 7             | 60 (20-300)    | 4          | 160 (160-300)  | <b>.05</b> |
| Week 2                                                                                                                                                                                 | 6             | 225 (30-300)   | 4          | 110 (0-240)    | .28        |
| Change                                                                                                                                                                                 | 6             | 185 (-30-280)  | 4          | -50 (-300-80)  | <b>.09</b> |
| E-cadherin                                                                                                                                                                             |               |                |            |                |            |
| Baseline                                                                                                                                                                               | 12            | 170 (0-300)    | 7          | 5 (0-300)      | .49        |
| Week 2                                                                                                                                                                                 | 6             | 300 (300-300)  | 4          | 300 (180-300)  | .31        |
| Change                                                                                                                                                                                 | 6             | 90 (0-300)     | 4          | 89.5 (0-300)   | 1.00       |
| Vimentin                                                                                                                                                                               |               |                |            |                |            |
| Baseline                                                                                                                                                                               | 9             | 0 (0-210)      | 7          | 30 (0-60)      | .31        |
| Week 2                                                                                                                                                                                 | 5             | 15 (0-270)     | 4          | 40 (5-270)     | .38        |
| Change                                                                                                                                                                                 | 4             | 9.5 (0-110)    | 4          | 25 (-25-210)   | .66        |
| COX-2                                                                                                                                                                                  |               |                |            |                |            |
| Baseline                                                                                                                                                                               | 12            | 115 (0-300)    | 7          | 240 (150-300)  | <b>.05</b> |
| Week 2                                                                                                                                                                                 | 6             | 200 (80-300)   | 4          | 160 (80-300)   | .66        |
| Change                                                                                                                                                                                 | 6             | 15 (-140-240)  | 4          | -85 (-160-140) | .59        |
| Nodal                                                                                                                                                                                  |               |                |            |                |            |
| Baseline                                                                                                                                                                               | 11            | 240 (70-300)   | 7          | 285 (80-300)   | .58        |
| Week 2                                                                                                                                                                                 | 6             | 250 (0-300)    | 4          | 180 (160-300)  | .91        |
| Change                                                                                                                                                                                 | 5             | 0 (-100-120)   | 4          | 0 (-100-80)    | 1.00       |

<sup>a</sup> Gene expression in patient samples was measured by immunohistochemical staining before (baseline) and after (week 2) the first dose of panitumumab.

**eTable 3.** Genes Significantly Changed in Patient Samples between Before and After Panitumumab Treatment.

| Gene             | Gene Name                                    | Log (Fold Change)* | P Value | Biological Functions                                                                                                                                                                                                                                                   |
|------------------|----------------------------------------------|--------------------|---------|------------------------------------------------------------------------------------------------------------------------------------------------------------------------------------------------------------------------------------------------------------------------|
| <b>TN-IBC</b>    |                                              |                    |         |                                                                                                                                                                                                                                                                        |
| <i>POU3F3</i>    | POU class 3 homeobox 3                       | -2.57              | .03     | Regulation of cell proliferation, apoptotic process, and transcription from RNA polymerase II promoter; regulation of nervous system development.                                                                                                                      |
| <i>EGR1</i>      | Early growth response 1                      | -0.85              | .05     | Regulation of transcription from RNA polymerase II promoter; regulation of BMP and canonical Wnt receptor signaling pathway; regulation of smooth muscle cell migration and proliferation; regulation of apoptotic process, T cell differentiation, and wound healing. |
| <i>BBOX1</i>     | Gamma-butyrobetaine hydroxylase 1            | 1.95               | .002    | Carnitine biosynthetic process and oxidation-reduction process.                                                                                                                                                                                                        |
| <i>GLYATL2</i>   | Glycine-N-acyltransferase-like 2             | 1.56               | .03     | Mitochondrial acyltransferase that transfers the acyl group to the N-terminus of glycine.                                                                                                                                                                              |
| <i>MUCL1</i>     | Mucin-like 1                                 | 2.31               | .03     | O-glycan processing.                                                                                                                                                                                                                                                   |
| <i>LCN2</i>      | Lipocalin 2                                  | 2.18               | .03     | Apoptotic process; immune system process; innate immune response; and cellular response to interleukin-1.                                                                                                                                                              |
| <b>HR+/HER2-</b> |                                              |                    |         |                                                                                                                                                                                                                                                                        |
| <i>FAM196A</i>   | Family with sequence similarity 196 member A | -2.72              | .04     | Unknown.                                                                                                                                                                                                                                                               |
| <i>SHISA2</i>    | Shisa family member 2                        | -2.31              | .001    | Regulation of fibroblast growth factor receptor and Wnt receptor signaling pathways.                                                                                                                                                                                   |
| <i>MMP13</i>     | Matrix metalloproteinase 13                  | -2.05              | .001    | Extracellular matrix disassembly and metastasis.                                                                                                                                                                                                                       |
| <i>GJB2</i>      | Gap junction protein beta 2                  | -2.03              | .00     | Cell-cell signaling; cell communication; and gap junction assembly.                                                                                                                                                                                                    |
| <i>SLC24A2</i>   | Solute carrier family 24 member 2            | -1.58              | .007    | Calcium and other ions transmembrane transport and cellular calcium ion homeostasis.                                                                                                                                                                                   |
| <i>IL1RL1</i>    | Interleukin 1 receptor-like 1                | -1.58              | .006    | Cytokine-mediated signaling pathway; regulation of T-helper 1 type immune response, inflammatory response, and macrophage activation; and signal transduction.                                                                                                         |
| <i>MMP11</i>     | Matrix metalloproteinase 11                  | -1.47              | .02     | Extracellular matrix disassembly and metastasis.                                                                                                                                                                                                                       |
| <i>SERPINA11</i> | Serpin family A member 11                    | -1.44              | .05     | Negative regulation of endopeptidase or peptidase activity.                                                                                                                                                                                                            |

|                  |                                                            |       |          |                                                                                                                                                                            |
|------------------|------------------------------------------------------------|-------|----------|----------------------------------------------------------------------------------------------------------------------------------------------------------------------------|
| <i>HDC</i>       | Histidine decarboxylase                                    | -1.39 | .02      | Histamine biosynthetic process and histamine metabolic process.                                                                                                            |
| <i>GRIA2</i>     | Glutamate ionotropic receptor AMPA type subunit 2          | -1.24 | .01      | Ion transmembrane transport; regulation of receptor recycling; and signal transduction.                                                                                    |
| <i>ADAMTS16</i>  | ADAM metalloproteinase with thrombospondin type 1 motif 16 | -1.21 | .03      | Metalloproteinase activity and proteolysis.                                                                                                                                |
| <i>IGFBP5</i>    | Insulin-like growth factor binding protein 5               | -1.11 | .001     | Regulation of cell growth and migration; regulation of insulin-like growth factor receptor signaling pathway; cellular protein metabolic process; and signal transduction. |
| <i>GJA1</i>      | Gap junction protein alpha 1                               | -1.01 | 1.35E-08 | Component of gap junctions and regulates cell death, proliferation, and differentiation.                                                                                   |
| <i>SNORA24</i>   | Small nucleolar RNA, H/ACA box 24                          | -0.96 | .006     | Unknown.                                                                                                                                                                   |
| <i>DACH1</i>     | Dachshund family transcription factor 1                    | -0.93 | .01      | Cell proliferation; negative regulation of cell migration; and negative regulation of fibroblast proliferation.                                                            |
| <i>KIAA1549L</i> | KIAA1549-like                                              | -0.75 | .007     | Positive regulation of defense response to virus by host.                                                                                                                  |
| <i>SULF1</i>     | Sulfatase 1                                                | -0.73 | .01      | Apoptotic process; cell adhesion; negative regulation of cell migration.                                                                                                   |
| <i>RORC</i>      | RAR related orphan receptor C                              | -0.66 | .03      | Adipose tissue development; alpha-beta T cell differentiation; and cell differentiation.                                                                                   |
| <i>KCNMA1</i>    | Potassium calcium-activated channel subfamily M alpha 1    | -0.52 | .04      | Cellular potassium ion homeostasis; ion transport; and regulation of apoptotic process.                                                                                    |
| <i>PLIN1</i>     | Perilipin 1                                                | 3.26  | .05      | Lipid catabolic process; lipid metabolic process; triglyceride catabolic process.                                                                                          |
| <i>ADH1B</i>     | Alcohol dehydrogenase 1B (class I), beta polypeptide       | 3.20  | 4.17E-05 | Metabolism of ethanol, retinol, other aliphatic alcohols, hydroxysteroids, and lipid peroxidation products.                                                                |
| <i>G0S2</i>      | G0/G1 switch 2                                             | 2.74  | .01      | Apoptotic process; regulation of extrinsic apoptotic signaling pathway.                                                                                                    |
| <i>PI16</i>      | Peptidase inhibitor 16                                     | 2.26  | .004     | Regulation of cell growth involved in cardiac muscle cell development and regulation of peptidase activity.                                                                |
| <i>CHRD1</i>     | Chordin-like 1                                             | 2.08  | .008     | Encodes an antagonist of bone morphogenetic protein 4; regulation of retinal angiogenesis in response to hypoxia.                                                          |
| <i>CFD</i>       | Complement factor D                                        | 1.86  | .001     | Complement activation and innate immune response.                                                                                                                          |

|               |                                           |      |     |                                                                   |
|---------------|-------------------------------------------|------|-----|-------------------------------------------------------------------|
| <i>LILRB5</i> | Leukocyte immunoglobulin-like receptor B5 | 1.55 | .01 | Adaptive immune response.                                         |
| <i>ABCA8</i>  | ATP binding cassette subfamily A member 8 | 1.33 | .04 | Transport of molecules across extra- and intracellular membranes. |
| <i>ABCA6</i>  | ATP binding cassette subfamily A member 6 | 0.87 | .05 | Transport of molecules across extra- and intracellular membranes. |
| <i>PLTP</i>   | Phospholipid transfer protein             | 0.69 | .05 | Lipid binding and transport.                                      |

\*Fold change: gene expression at week 2/gene expression at baseline.

**eFigure 1. Trial Design.**

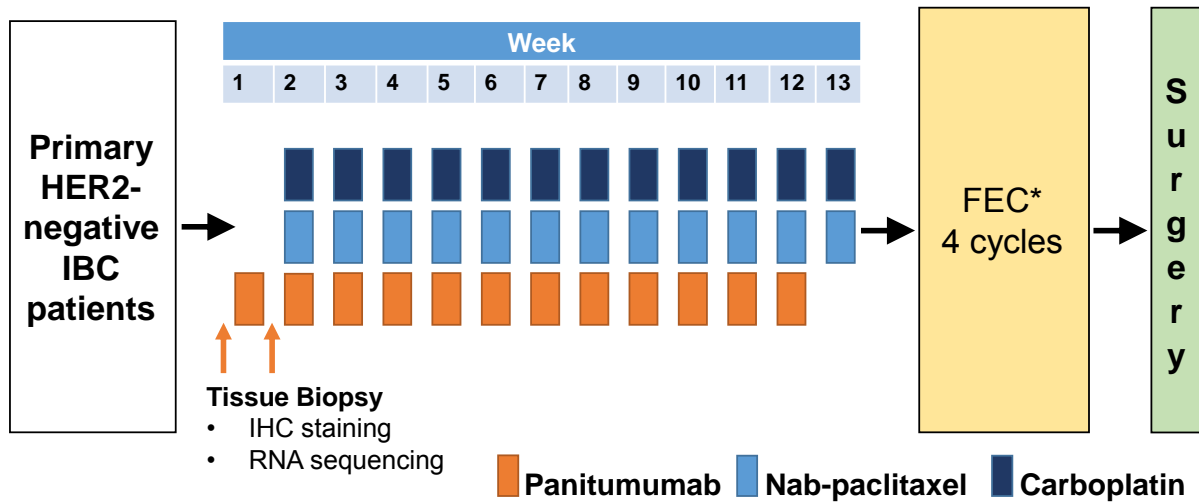

\*FEC: 5-fluorouracil (500 mg/m<sup>2</sup>), epirubicin (100 mg/m<sup>2</sup>), cyclophosphamide (500 mg/m<sup>2</sup>), every 3 weeks for the first 17 patients. Because 3 of the 17 patients developed grade 3 or higher thrombocytopenia and 1 required platelet transfusion, the PNC treatment cycle for the remaining 23 patients was revised to 3 weeks of weekly treatment followed by 1 week off to allow bone marrow recovery.

**eFigure 2.** Panitumumab Dose Modification Algorithm for Toxicity.

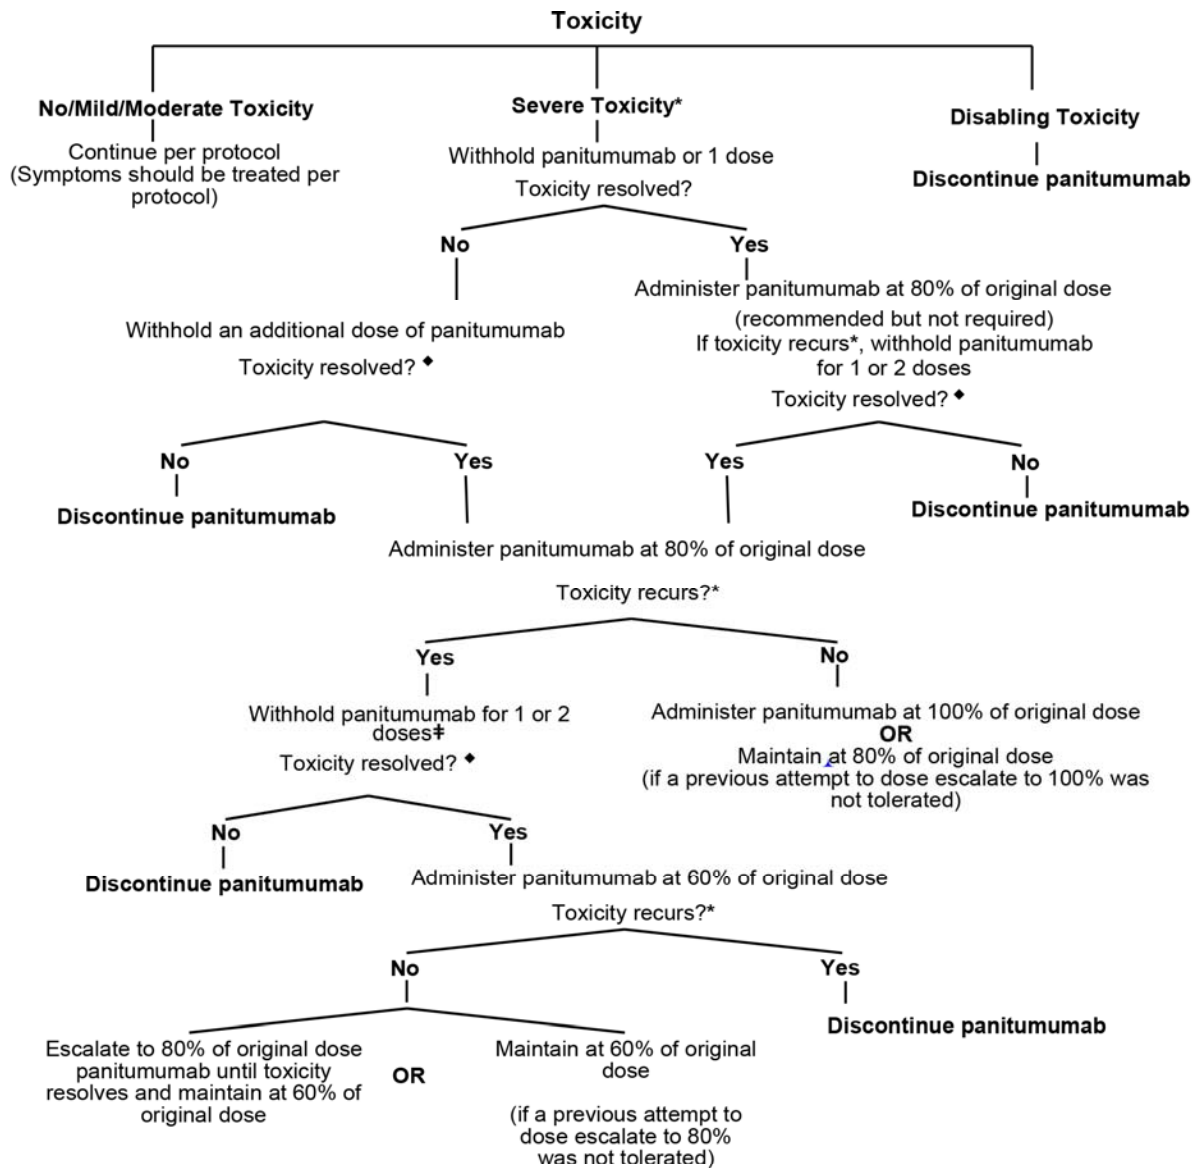

\* Assess toxicity before each dose. Toxicity recurs = meets the criteria for withholding a dose of panitumumab at any time during the study.

• Assess toxicity before each dose. Toxicity resolved = meets the criteria for restarting panitumumab. Subjects from whom > 2 subsequent cycles of panitumumab are required to be withheld should not be re-treated with panitumumab.

‡ Up to 2 subsequent doses of panitumumab may be withheld but panitumumab may not be withheld longer than 6 weeks from the previous dose. The second dose should only be withheld if the toxicity has not resolved by the time that the subsequent cycle of chemotherapy is due.



**eFigure 3.** Disease-free Survival (A) and Overall Survival (B) Estimates for 37 Evaluable Patients

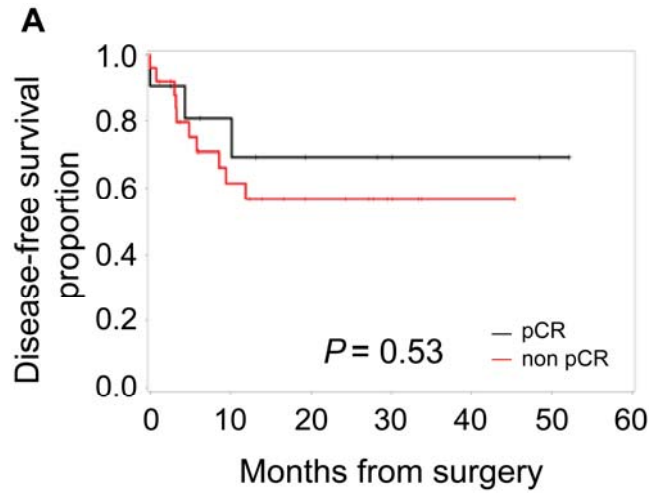

| No. at risk | 0 months | 10 months | 20 months | 30 months | 40 months | 50 months |
|-------------|----------|-----------|-----------|-----------|-----------|-----------|
| No pCR      | 26       | 13        | 8         | 4         | 1         | 0         |
| pCR         | 11       | 7         | 4         | 3         | 2         | 1         |

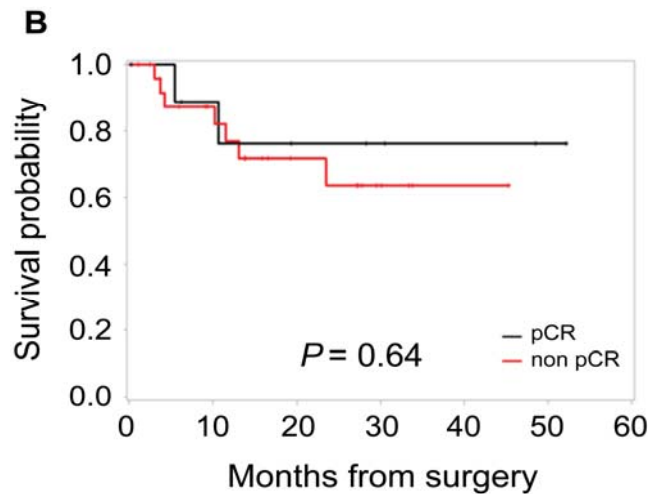

| No. at risk | 0 months | 10 months | 20 months | 30 months | 40 months | 50 months |
|-------------|----------|-----------|-----------|-----------|-----------|-----------|
| No pCR      | 26       | 17        | 9         | 4         | 1         | 0         |
| pCR         | 11       | 7         | 4         | 3         | 2         | 1         |

**eFigure 4.** Differentially Expressed Genes Regulated by Panitumumab. (A) Genes differentially expressed after panitumumab treatment in patients with TN-IBC. Each symbol represents an individual patient. \* pCR; • Non-pCR;  $\Delta$  unknown. (B) Ingenuity Pathway Analysis showing the canonical pathways of differentially regulated genes (top panel) and related biological processes (bottom panel) in patients with HR-positive/HER2-negative IBC.

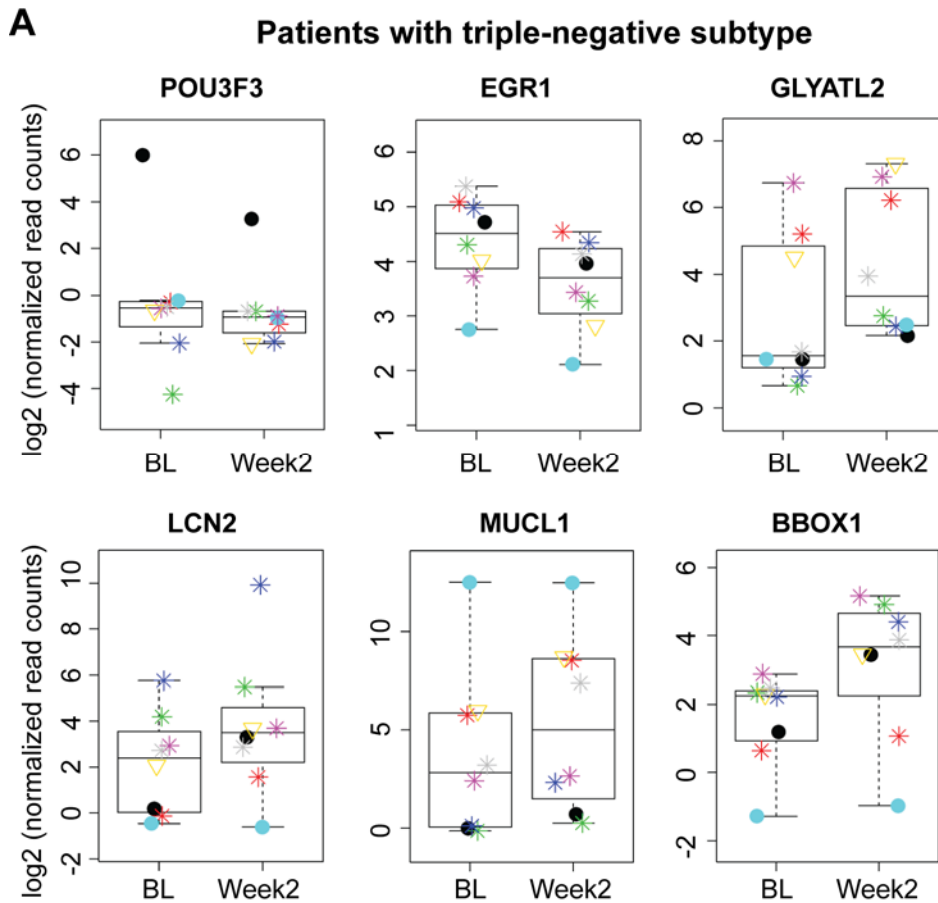

**B** Patients with HR+/HER2- subtype

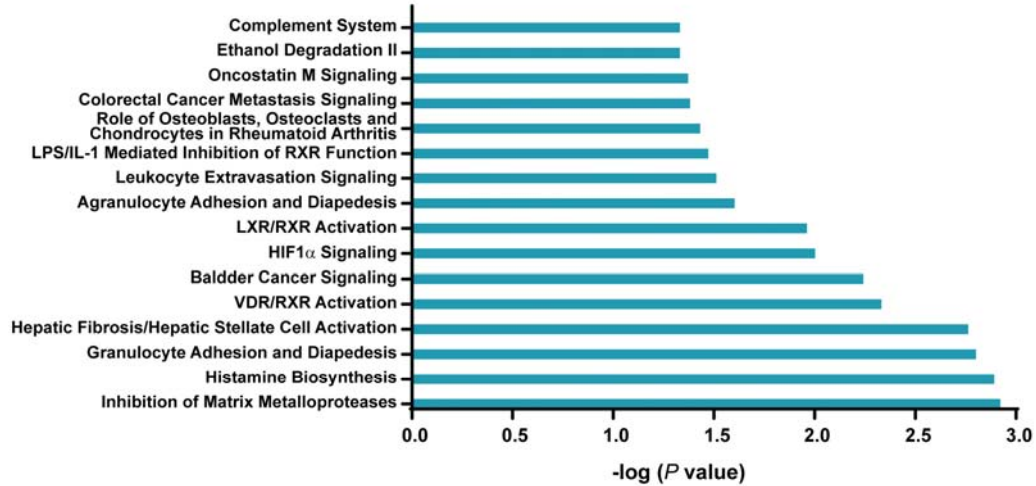

| Biological Processes                                    | Involved Pathways                            |
|---------------------------------------------------------|----------------------------------------------|
| <b>Metastasis</b>                                       | Matrix metalloproteases                      |
|                                                         | Colorectal cancer metastasis signaling       |
| <b>Cellular immune response</b>                         | Granulocyte adhesion and diapedesis          |
|                                                         | Agranulocyte adhesion and diapedesis         |
|                                                         | Leukocyte extravasation signaling            |
|                                                         | Complement system pathways                   |
| <b>Inflammation</b>                                     | Oncostatin M                                 |
|                                                         | Granulocyte adhesion and diapedesis          |
|                                                         | Agranulocyte adhesion and diapedesis         |
|                                                         | Leukocyte extravasation signaling            |
| <b>Retinoid signaling regulated biological function</b> | VDR/RXR activation                           |
|                                                         | LXR/RXR activation                           |
|                                                         | LPS/IL-1 mediated inhibition of RXR function |
